# Supplementary material for: Phenotype-based variation as a biomarker of sensitivity to molecularly targeted therapy in melanoma
Source: Royal Society of Chemistry journal article supplement (doi:10.1039/c6md00466k), 2016-10-27
Supplement: c6md00466k2.pdf [file c6md00466k2.pdf]

| #  | Type       | Cell lines used in this study | Cell lines used for C-MAP microarray profiling | BRAF mutation* | Flow cytometry  | Immunohistochemistry** |                   |         |            |        | Pro (r) | Inv (r) | EMT-Score*** | CSC-Score*** | MLANA-RQ**** | INHBA-RQ**** | 17AAG_log(IC50) | AZD6244_log(IC50) | AZD0530_log(IC50) | 10a-log(IC50) |
|----|------------|-------------------------------|------------------------------------------------|----------------|-----------------|------------------------|-------------------|---------|------------|--------|---------|---------|--------------|--------------|--------------|--------------|-----------------|-------------------|-------------------|---------------|
|    |            |                               |                                                |                | HMW-MAA (CSPG4) | HMB45 (gp100)          | Melan A (MART-10) | S100    | R-24 (GD2) |        |         |         |              |              |              |              |                 |                   |                   |               |
| 1  | Primary    | M1                            | M1                                             | V600           |                 |                        |                   |         | 4+         | 0.03   | 0.672   | 1.133   | 0.851        | -5.925       | -1.634       | -1.425       | 0.741           | 1.165             | 0.771             |               |
| 2  | Primary    | M13                           | M13                                            | V600           |                 |                        |                   |         | 3+         | 0.279  | 0.495   | 0.224   | 2.027        |              |              |              |                 |                   |                   |               |
| 3  | Primary    | M133                          | M133                                           | WT             |                 |                        |                   |         | 4+         | -0.175 | 0.571   | -0.749  | -10.024      | 1.117        | -0.933       | -1.410       | 1.158           | 1.386             | -0.780            |               |
| 4  | Primary    | M139                          | M139                                           | V600           |                 |                        |                   | 2+      | 4+         | 0.679  | 0.034   | -0.568  | 0.674        |              |              | 0.536        | -0.867          | 1.246             |                   |               |
| 5  | Primary    | M144                          | M144                                           | WT             |                 |                        |                   |         |            | -0.109 | 0.554   | -1.607  | -10.529      | 0.008        | -0.932       |              |                 |                   | 0.275             |               |
| 6  | Primary    | M145                          | M145                                           | WT             |                 |                        |                   |         | 3+         | -0.27  | 0.655   | 1.740   | 0.674        |              |              |              |                 |                   |                   |               |
| 7  | Primary    | M154                          | M154                                           | V600           |                 |                        |                   |         | 4+         | 0      | -0.118  | 0.715   | 1.740        | 0.873        |              |              |                 |                   |                   |               |
| 8  | Primary    | M187                          | M187                                           | WT             |                 |                        |                   | 4+      | 4+         | 0.624  | 0.045   | -2.503  | 1.352        | -10.713      | 12.631       |              |                 |                   | -0.144            |               |
| 9  | Primary    | M189                          | M189                                           | V600           |                 |                        |                   |         |            | 0.588  | 0.234   | -0.476  | 0.552        | -9.606       | 6.619        | 0.350        | -1.095          | 1.385             | -0.646            |               |
| 10 | Primary    | M193                          | M193                                           | WT             |                 |                        |                   | 0       | 3+         | -0.259 | 0.608   | 1.740   | 0.738        | 1.647        | -0.084       | 0.165        | 0.599           | 1.342             | 0.955             |               |
| 11 | Primary    | M202                          | M202                                           |                |                 |                        |                   | 4+      | 4+         | 0.533  | 0.162   | -1.319  | 1.159        |              |              |              |                 |                   |                   |               |
| 12 | Primary    | M2025                         | M2025                                          | WT             |                 |                        |                   | 0%      | 70% 3+     | -0.258 | 0.606   | 1.740   | 0.335        | 0.000        | 0.000        | 0.259        | 3.074           | 1.225             | 0.889             |               |
| 13 | Primary    | M207                          | M207                                           | WT             |                 |                        |                   | 2+      | 3+         | -0.261 | 0.715   | 1.740   | -2.548       |              |              |              |                 |                   |                   |               |
| 14 | Primary    | M21                           | M21                                            | WT             | 50%             |                        |                   | 4+      | 5%         | 0.435  | 0.479   | 0.033   | 1.831        |              |              |              |                 |                   |                   |               |
| 15 | Primary    | M217                          | M217                                           | WT             |                 |                        |                   | 1+      | 4+         | 0      | -0.265  | 0.644   | 1.740        | 1.277        |              |              |                 |                   |                   |               |
| 16 | Primary    | M221                          | M221                                           | WT             |                 |                        |                   | 1+      | 4+         | -0.268 | 0.682   | 1.740   | 0.140        | 0.821        | 0.292        | -1.403       | 1.762           | 1.439             | 0.952             |               |
| 17 | Primary    | M24                           | M24                                            | WT             | 90%             |                        |                   | 4+      | 90%        | 0      | 0.633   | 0.044   | -0.468       | 2.658        | -6.025       | 7.545        | -1.235          | -0.593            | 1.484             | 0.321         |
| 18 | Primary    | M241new                       | M241new                                        | WT             |                 |                        |                   | 3+      | 4+         | 0.528  | 0.31    | -1.296  | 3.028        |              |              |              |                 |                   |                   |               |
| 19 | Primary    | M299                          | M299                                           | WT             |                 |                        |                   | 0       | 80% 2+     | 0%     | -0.27   | 0.651   | 1.740        | 1.803        |              |              | 0.897           | 3.243             | 1.295             |               |
| 20 | Primary    | M307                          | M307                                           | WT             |                 |                        |                   | 80% 4+  | 90% 3+     | 0.611  | 0.099   | -1.674  | 2.797        | -12.499      | 7.934        | 0.468        | -0.299          | 1.215             | -1.033            |               |
| 21 | Primary    | M332                          | M332                                           |                |                 |                        |                   | 0%      | 0%         | -0.268 | 0.672   | 1.740   | 0.798        |              |              |              |                 |                   |                   |               |
| 22 | Primary    | M336                          | M336                                           | WT             |                 |                        |                   |         |            | -0.24  | 0.645   | 1.038   | -1.587       |              |              |              |                 |                   |                   |               |
| 23 | Primary    | M34                           | M34                                            | WT             |                 |                        |                   | 1+      | 4+         | -0.277 | 0.628   | 1.740   | 0.926        | -0.128       | -1.216       |              |                 |                   | 0.385             |               |
| 24 | Primary    | M346                          | M346                                           | V600           |                 |                        |                   | 0%      | 100% 3+    | -0.287 | 0.68    | 1.740   | 2.399        |              |              |              |                 |                   |                   |               |
| 25 | Primary    | M369                          | M369                                           | V600           |                 |                        |                   | 0%      | 100% 1+    | 0.518  | 0.341   | -1.663  | 0.771        |              |              |              |                 |                   |                   |               |
| 26 | Primary    | M371                          | M371                                           | V600           |                 |                        |                   | 100% 3+ | 100% 4+    | 0.567  | 0.283   | -1.316  | 2.547        |              |              |              |                 |                   |                   |               |
| 27 | Primary    | M425                          | M425                                           | V600           | 100%            |                        |                   | 50% 3+  | 60% 4+     | 0.558  | 0.27    | -1.246  | 2.234        |              |              |              |                 |                   |                   |               |
| 28 | Primary    | M433                          | M433                                           | WT             |                 |                        |                   | 80% 4+  | 70% 4+     | 0.208  | 0.581   | -1.158  | 1.589        | 0.428        | 1.789        | 1.213        | 2.129           | 1.435             | 0.771             |               |
| 29 | Primary    | M465                          | M465                                           | WT             |                 |                        |                   | 0%      | 0%         | -0.213 | 0.649   | 1.300   | -7.692       |              |              |              |                 |                   |                   |               |
| 30 | Primary    | M51                           | M51                                            | V600           |                 |                        |                   | 4+      | 4+         | 0.659  | 0.016   | -4.520  | 1.679        |              |              |              |                 |                   |                   |               |
| 31 | Primary    | M517                          | M517                                           | WT             |                 |                        |                   |         |            | -0.267 | 0.623   | 1.475   | 1.627        |              |              |              |                 |                   |                   |               |
| 32 | Primary    | M7                            | M7                                             | WT             | 15%             |                        |                   | 4+      | 90%        | 0.601  | 0.074   | -1.067  | 0.727        | -11.602      | 7.945        | 0.954        | 0.686           | 1.607             | 0.687             |               |
| 33 | Primary    | M77                           | M77                                            | V600           |                 |                        |                   | 1+      | 2+         | 0.327  | 0.483   | 0.971   | 1.014        | -4.093       | 1.446        |              |                 |                   | 0.636             |               |
| 34 | Primary    | M84                           | M84                                            | WT             |                 |                        |                   | 0       | 4+         | -0.243 | 0.685   | 1.740   | -1.836       |              |              | -0.772       | -0.270          | 1.215             |                   |               |
| 35 | Primary    | SHM20A2                       | SHM20A2                                        |                |                 |                        |                   | 100% 1+ | 100% 3+    | 0.484  | 0.221   | -5.365  | -4.568       | -12.687      | 7.352        |              |                 |                   | -0.442            |               |
| 36 | Primary    | SHM21.5                       | SHM21.5                                        |                | 98%             |                        |                   | 0       | 4.50%      | 0.186  | 0.531   | -0.056  | -0.294       |              |              |              |                 |                   |                   |               |
| 37 | Commercial | 624                           |                                                |                |                 |                        |                   |         |            | 0.895  | -0.097  |         |              | -2.008       | 6.467        |              |                 |                   | 0.806             |               |
| 38 | Commercial | A2058                         |                                                | V600           |                 |                        |                   |         |            | 0.918  | 0.112   |         |              | -9.133       | 8.355        |              |                 |                   | 0.930             |               |
| 39 | Commercial | G361                          |                                                | V600           |                 |                        |                   |         |            | 0.864  | -0.049  |         |              | -5.224       | 8.922        |              |                 |                   | 0.701             |               |
| 40 | Commercial | MEWO                          |                                                | WT             |                 |                        |                   |         |            | 0.900  | -0.027  |         |              |              | -11.461      | 7.128        |                 |                   | 1.192             |               |
| 41 | Commercial | SKMEL10                       |                                                | WT             |                 |                        |                   |         |            |        |         |         |              | -7.965       | 7.499        |              |                 |                   | 0.690             |               |
| 42 | Commercial | SKMEL28                       |                                                | V600           |                 |                        |                   |         |            | 0.947  | -0.082  |         |              | 0.791        | -0.354       |              |                 |                   | 1.195             |               |
| 43 | Commercial | SKMEL5                        |                                                | V600           |                 |                        |                   |         |            | 0.925  | -0.119  |         |              | -8.930       | 9.026        |              |                 |                   | 0.709             |               |
| 44 | Commercial | SKMEL9                        |                                                |                |                 |                        |                   |         |            |        |         |         |              | -3.547       | 7.050        |              |                 |                   | 1.398             |               |

\* V600E or V600K mutations. Not known unless otherwise indicated.

\*\* Staining intensity (from 0+ to 4+) and percent cells staining is shown

\*\*\* EMT-Score increases as cells are more mesenchymal

\*\*\*\* CSC-Score decreases as cells are more stem-cell-like

\*\*\*\*\* Relative quantity (q-RT-PCR)
