# Supplementary material for: Phenotype-based variation as a biomarker of sensitivity to molecularly targeted therapy in melanoma
Source: Royal Society of Chemistry journal article supplement (doi:10.1039/c6md00466k), 2016-10-27
Supplement: c6md00466k3.pdf [file c6md00466k3.pdf]

**Supplementary Table - Linear correlation measures of drugs with PRO and INV values of CCLs**

| DRUG         | TARGET | PROr -<br>AA(norm) -<br>Pearson's r | INVR -<br>AA(norm) -<br>Pearson's r | PROr-<br>RANK | INVR -<br>RANK | RANK-<br>SUM |
|--------------|--------|-------------------------------------|-------------------------------------|---------------|----------------|--------------|
| AZD0530      | SRC    | -0.488                              | 0.401                               | 1             | 1              | 2            |
| PF2341066    | c-MET  | -0.390                              | 0.307                               | 2             | 3              | 5            |
| 17-AAG       | HSP90  | -0.274                              | 0.327                               | 4             | 2              | 6            |
| TAE684       | ALK    | -0.335                              | 0.259                               | 3             | 4              | 7            |
| LBW242       | XIAP   | -0.130                              | 0.200                               | 7             | 5              | 12           |
| Topotecan    | TOP1   | -0.203                              | 0.092                               | 6             | 7              | 13           |
| Lapatinib    | EGFR   | -0.130                              | 0.099                               | 8             | 6              | 14           |
| Irinotecan   | TOP1   | -0.258                              | 0.069                               | 5             | 9              | 14           |
| Nilotinib    | ABL    | -0.093                              | 0.078                               | 11            | 8              | 19           |
| ZD-6474      | EGFR   | -0.111                              | 0.048                               | 10            | 12             | 22           |
| Paclitaxel   | TUBB1  | -0.125                              | 0.044                               | 9             | 13             | 22           |
| PHA-665752   | c-MET  | -0.044                              | 0.063                               | 13            | 10             | 23           |
| PD-0332991   | CDK4   | 0.012                               | 0.055                               | 15            | 11             | 26           |
| TKI258       | FGFR   | -0.082                              | 0.017                               | 12            | 14             | 26           |
| Erlotinib    | EGFR   | -0.044                              | -0.052                              | 14            | 17             | 31           |
| L-685458     | GS     | 0.037                               | 0.011                               | 17            | 15             | 32           |
| AEW541       | IGF1R  | 0.027                               | -0.105                              | 16            | 18             | 34           |
| Nutlin-3     | MDM2   | 0.135                               | 0.010                               | 19            | 16             | 35           |
| RAF265       | RAF    | 0.210                               | -0.178                              | 20            | 19             | 39           |
| Panobinostat | HDAC   | 0.094                               | -0.288                              | 18            | 21             | 39           |
| PLX4720      | RAF    | 0.303                               | -0.256                              | 22            | 20             | 42           |
| Sorafenib    | RTK    | 0.268                               | -0.394                              | 21            | 22             | 43           |
| PD0325901    | MEK    | 0.535                               | -0.429                              | 24            | 23             | 47           |
| AZD6244      | MEK    | 0.526                               | -0.445                              | 23            | 24             | 47           |
